# Supplementary material
Source: MDPI journal article supplement (https://www.mdpi.com/2673-4583/10/1/82)
Supplement: s1 [file s1 › chemproc-1795836-supplementary.pdf]

Production characteristics of miscanthus  
(Miscanthus x giganteus Greef et Deu) under agroecological conditions of Serbia

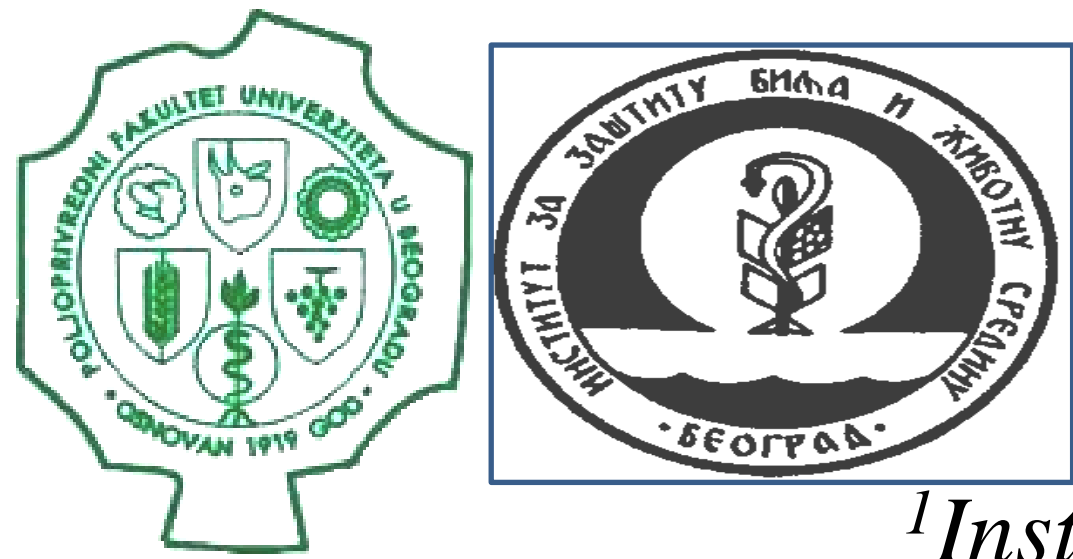

Nenad Đurić<sup>1</sup>\*, Dobrivoj Poštić<sup>2</sup>, Vera Rajčić<sup>3</sup>, Gordana Branković<sup>4</sup>, Gorica Cvijanović<sup>5</sup>,  
Radiša Đorđević<sup>1</sup>, Slađana Savić<sup>1</sup>

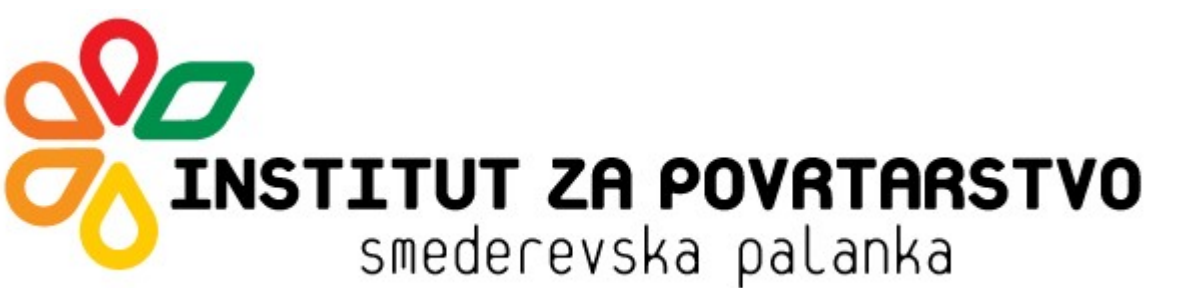

<sup>1</sup>Institute for Vegetable Crops, Karađorđeva 71, Smederevska Palanka, Serbia; e-mail: nenad.djuric@outlook.com

<sup>2</sup>Institute for Plant Protection and Environment, Teodora Drajzera 9, Beograd, Serbia; e-mail: pdobrivoj@yahoo.com

<sup>3</sup>Faculty of Agriculture, Kosančićeva 4, Kruševac, Serbia; e-mail: verarajicic@yahoo.com

<sup>4</sup>Faculty of Agriculture, Nemanjina 6, Zemun-Belgrade, Serbia; e-mail: gbrankovic@agrif.bg.ac.rs

<sup>5</sup>Institute of Information Technologies, University of Kragujevac, Jovana Cvijića bb, Kragujevac, Serbia; e-mail: cvijagor@yahoo.com

Introduction

Miscanthus was originally grown only as an ornamental plant. It is characterized by extremely strong growth and high genetic potential for fertility (Đurić *et al.*, 2019) and is becoming important as an energy crop. Miscanthus is mainly grown for production of biofuels from aboveground biomass. Fresh plant biomass mown in the panicle forming stage, serves as raw material for biogas and bio ethanol, while dry stalks are burned directly in large boiler plants or used to produce pellets and briquettes (Janković *et al.*, 2017), (Maksimović, 2016). The aim of this research is to analyse the influence of agroclimatic conditions of the Srem locality in Serbia on the yield of dry miscanthus plant mass in five different production years, with and without spring fertilization with nitrogen fertilizers.

Material and methods

The experiment was set up at a site in eastern Srem in the Danube village of Surduk, in 2012. The land belongs to the type of carbonate chernozem on a loess plateau. It is located at an altitude of 150 meters. For the time being, a plantation was formed in April 2012, on the 10 m long and 2 m wide experimental plot, by planting two rhizomes per square meter, so that 8 elementary plots with two clusters, or a total of 40 clusters, were obtained. To date, every year at the end of March, 30 kg per ha-1 of pure nitrogen were added on four plots in a random distribution, while on the other four plots plants were grown without additional mineral fertilizers.

Results

Table 1. Stalk height in the panicle stage (cm) 2015-2019

| Year/Variant              | 2015  | 2016   | 2017  | 2018 | 2019    | AVERAGE |
|---------------------------|-------|--------|-------|------|---------|---------|
| Control                   | 222   | 295    | 235   | 328  | 357     | 287,4   |
| N, 30 kg ha <sup>-1</sup> | 227   | 318    | 242   | 356  | 361     | 300,4   |
| Average                   | 224,5 | 306,5  | 238,5 | 342  | 359     | 294,1   |
| LSD, years                | 5%    | 74,474 |       | 1%   | 129,668 |         |
| LSD, N <sub>30</sub>      | 5%    | 15,26  |       | 1%   | 26,57   |         |

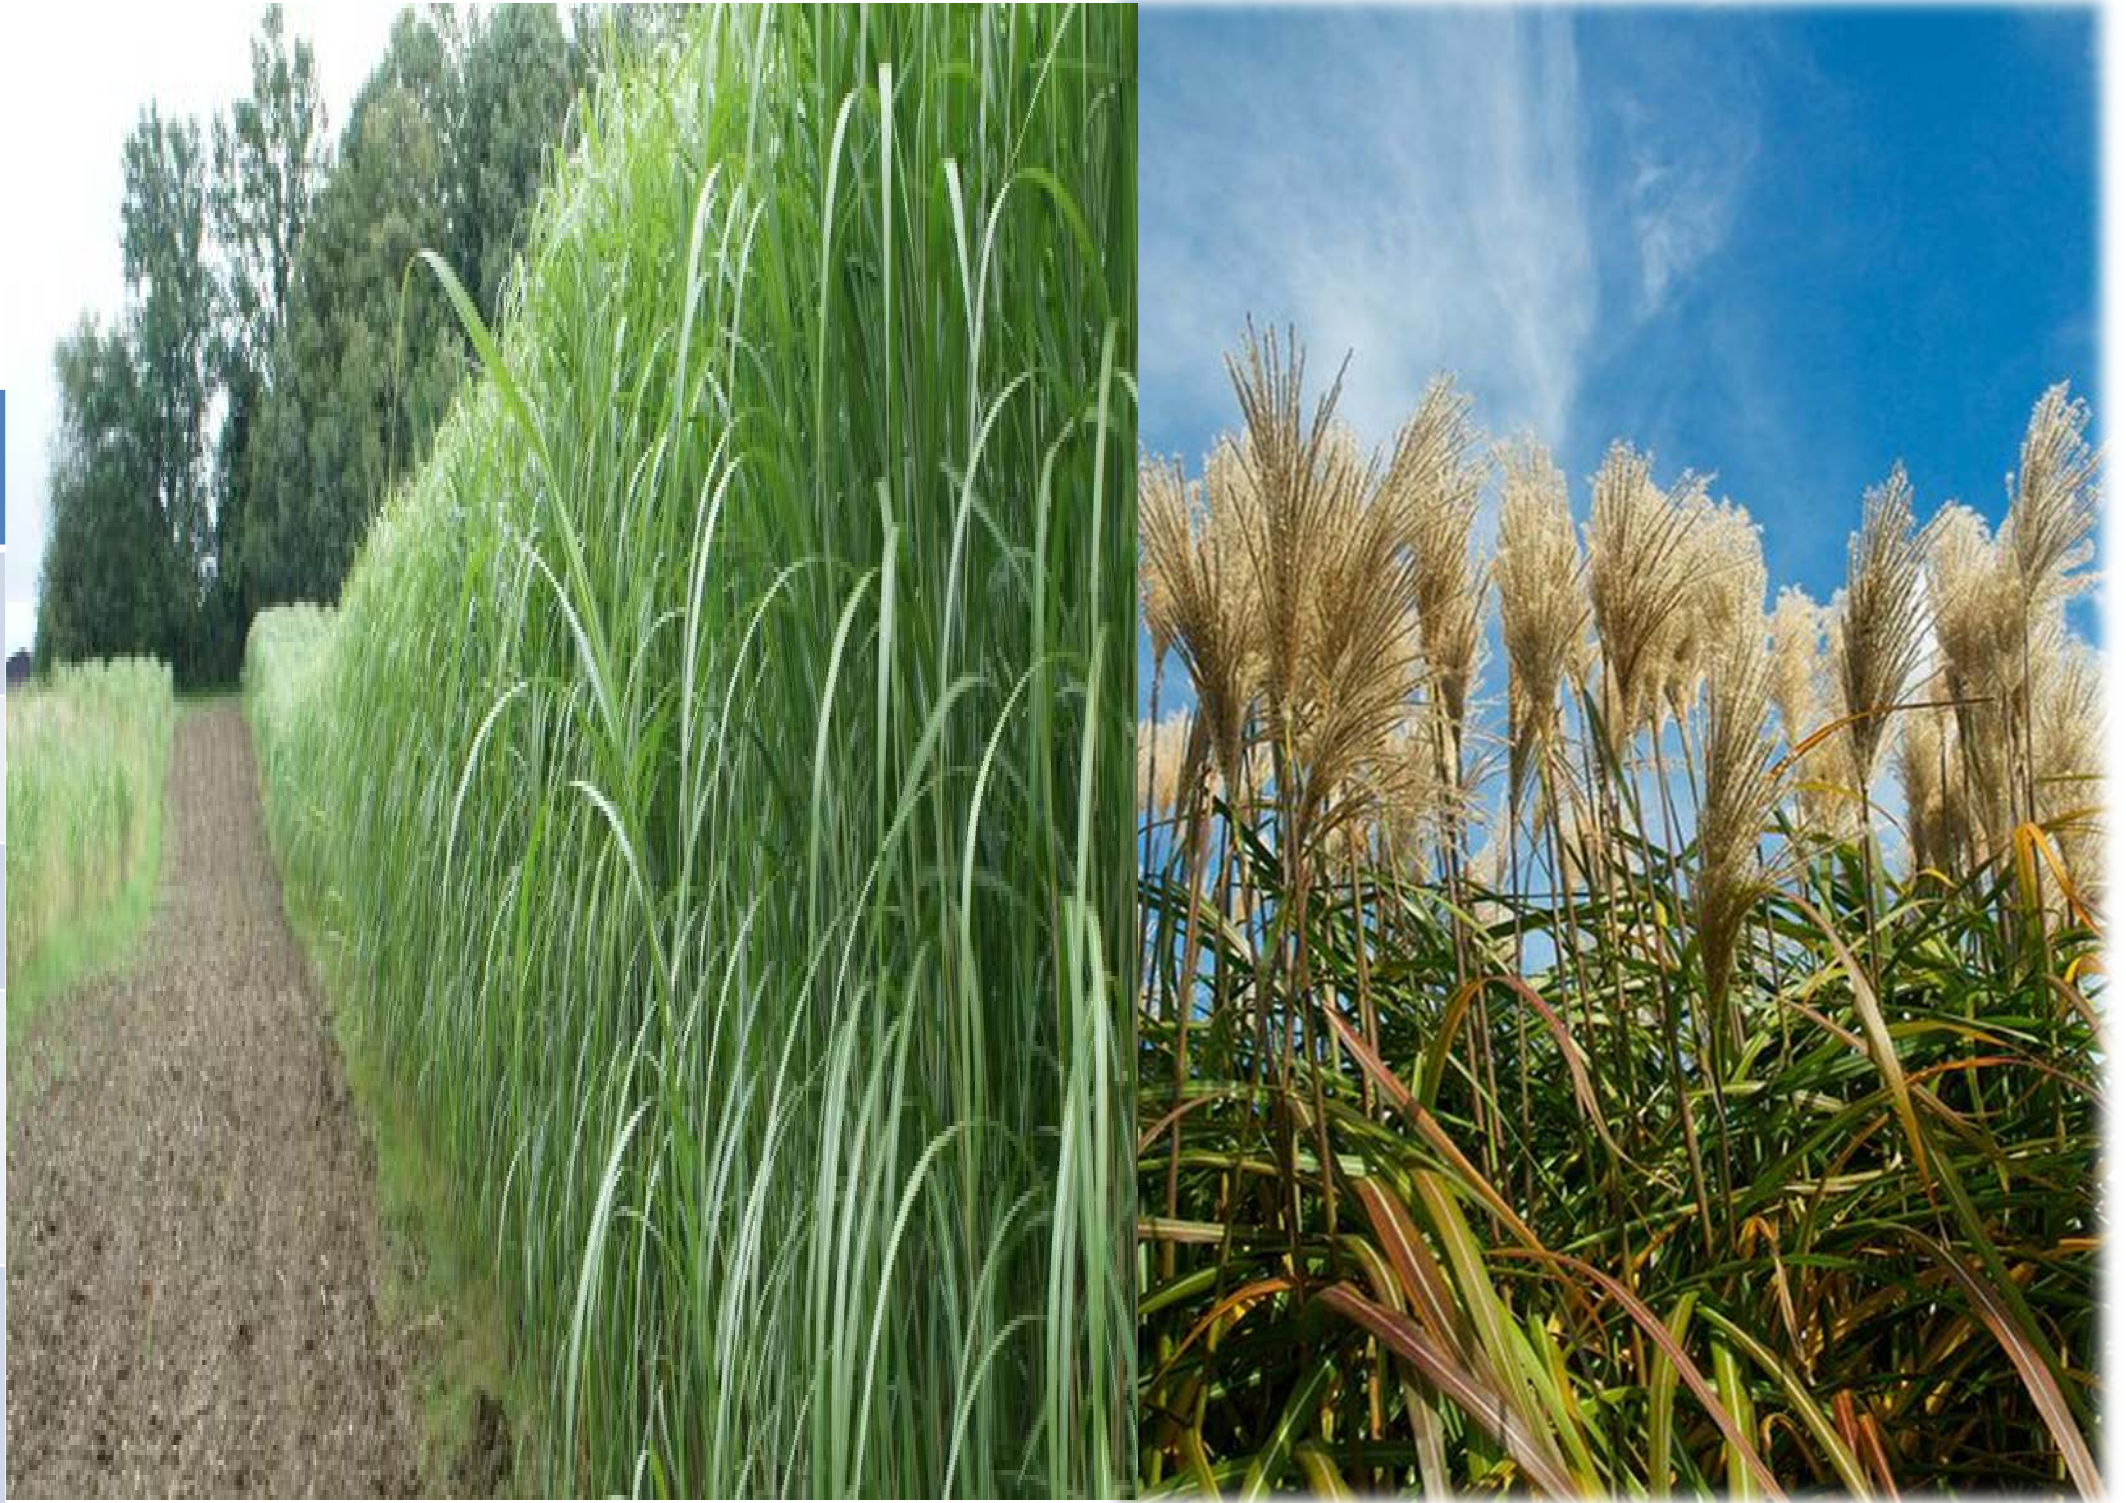

Table 2. Dry stalk yield (kg ha<sup>-1</sup>) 2015-2019

| Year/Variant              | 2015   | 2016   | 2017   | 2018   | 2019    | AVERAGE |
|---------------------------|--------|--------|--------|--------|---------|---------|
| Control                   | 20.425 | 25.320 | 18.025 | 30.655 | 33.373  | 25.560  |
| N, 30 kg ha <sup>-1</sup> | 21.470 | 25.550 | 17.980 | 32.210 | 34.525  | 26.347  |
| Average                   | 20.948 | 25.435 | 18.003 | 31.433 | 33.949  | 25.953  |
| LSD, years                | 5%     | 74,474 |        | 1%     | 129,668 |         |
| LSD, N <sub>30</sub>      | 5%     | 15,26  |        | 1%     | 26,57   |         |

Table 3. Stalk cellulose content in (%) 2015-2019

| Year/Variant              | 2015  | 2016  | 2017  | 2018  | 2019  | AVERAGE |
|---------------------------|-------|-------|-------|-------|-------|---------|
| Control                   | 31,95 | 32,13 | 32,21 | 32,09 | 32,14 | 32,11   |
| N, 30 kg ha <sup>-1</sup> | 32,01 | 32,20 | 32,19 | 32,01 | 32,16 | 32,12   |
| Average                   | 31,98 | 32,17 | 32,20 | 32,05 | 32,15 | 32,11   |
| LSD, years                | 5%    | 0,253 |       | 1%    | 0,431 |         |
| LSD, N <sub>30</sub>      |       | 0,091 |       |       | 0,156 |         |

Conclusion

The average value of stalk height during the five-year research was 294.1 cm, with very significant variations by years of research. Nitrogen supplementation on a multi-year average also influenced this morphological trait of miscanthus. The yield of dry stalks for the entire experiment on a five-year average, calculated in kilograms per hectare, was 25,953 kg ha-1. Significant variations of dry stalks yield in the overall average were influenced by weather conditions, as well as crop nutrition. Dry stalks had a high share of cellulose in all variants and years of research (32.11%). The year factor had a very high statistical significance for stalk height (738.3\*\*) and dry stalk yield (6541.8\*\*). The year had no statistically significant effect on cellulose content. The fertilization factor had a very high statistical significance for stalk height (42.56\*\*) and dry stalk yield (105.43\*\*). Crop fertiliza-tion had no statistical significance on cellulose content.

**Acknowledgements:** This research was funded by the Ministry of Education, Science and Technological Development of the Republic of Serbia (Project No. 451-03-68/2020-14/200216).

References

1. Đurić, N., V. Popović, M. Tabaković, Z. Jovović, M. Čurović, M. Mladenović-Glamočlija, N. Rakoščanin, Đ. Glamočlija: Morfološke i produktivne osobine miskantusa u promenljivoj vodnoj režiji. Zbornik naučnih radova Instituta PKB Agroekonomik, Beograd, 2019; Vol. 25, br. 1-2, pp. 89-98. UDK 167.7.63, ISSN: 0354-1320

2. Janković, S., Đ. Glamočlija, S. Prodanović: Energetski usevi. Monografija. Institut za primenu nauke u poljoprivredi, Beograd, 2017; str. 255.

3. Maksimović, J. S.: Uticaj gustine sadnje na zakorovljenost zasada i prinos biomase miskantusa (Miscanthus x giganteus Greef et Deu.). Doktorska disertacija, Poljoprivredni fakultet, Zemun, 2016; str. 126
